# Supplementary material for: Fatigue Assessment by Blink Detected with Attachable Optical Sensors of Dye-Sensitized Photovoltaic Cells
Source: MDPI journal article supplement (doi:10.3390/mi9060310), 2018-06-20
Supplement: s1 [file s1]

# Supplementary Materials: Fatigue Assessment by Blink Detected with Attachable Optical Sensors of Dye-Sensitized Photovoltaic Cells

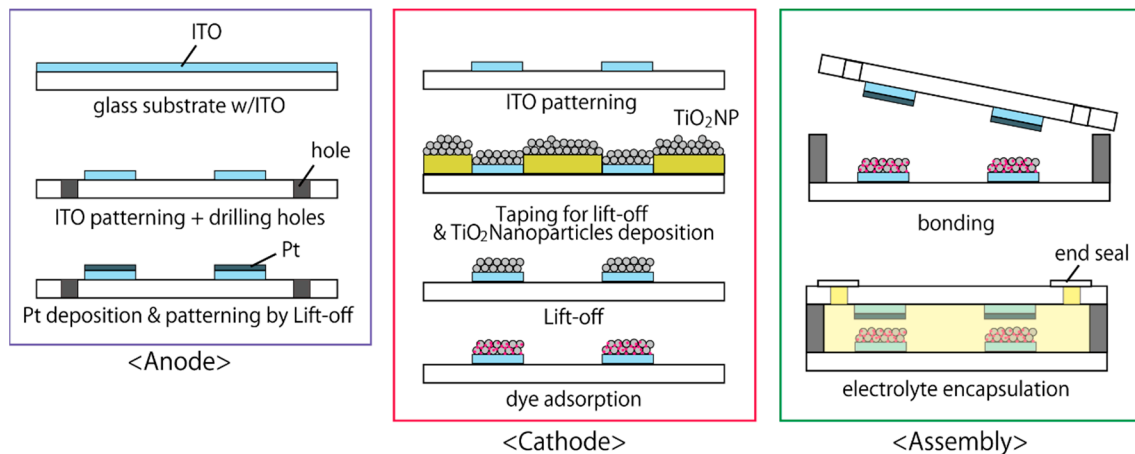

**Figure S1.** Fabrication process of the microfabricated dye-sensitized photovoltaic cells, which was used as the transparent optical sensors to detect eye blinks.
